# Supplementary material
Source: PubMed Central journal article supplement (PMC7116070)
Supplement: EMS94752-supplement-Supplementary_Materials.pdf [file EMS94752-supplement-Supplementary_Materials.pdf]

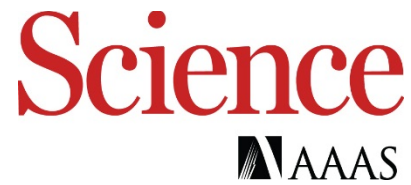

## Supplementary Materials for

### **Structure, mechanism, and regulation of the chloroplast ATP synthase**

Alexander Hahn, Janet Vonck, Deryck J. Mills, Thomas Meier\*, Werner Kühlbrandt\*

Correspondence to: [werner.kuehlbrandt@biophys.mpg.de](mailto:werner.kuehlbrandt@biophys.mpg.de) (WK), [t.meier@imperial.ac.uk](mailto:t.meier@imperial.ac.uk) (TM)

#### **This PDF file includes:**

Figures S1-S13

Table S1

References (69-78)

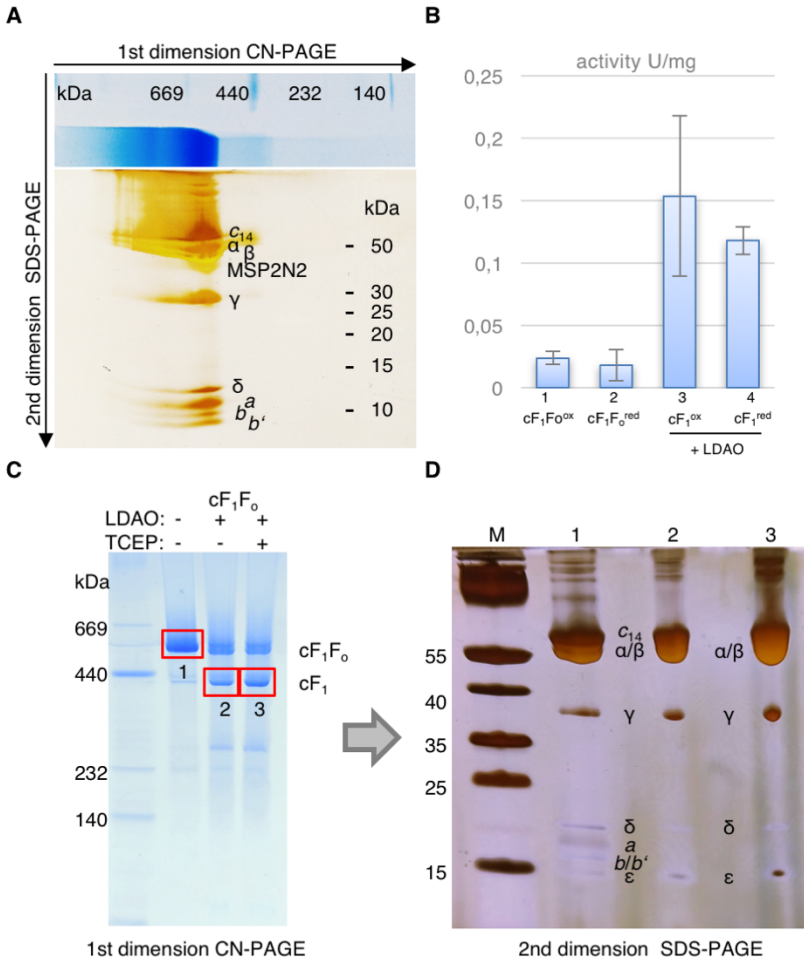

**Fig. S1**

**Purification, nanodisc reconstitution and hydrolytic activity of  $cF_1F_0$ .**  $cF_1F_0$  was purified from market spinach and reconstituted into lipid nanodiscs (see Materials and Methods for details). **A**, The  $cF_1F_0$  complex is intact and highly pure as demonstrated by two-dimensional gel electrophoresis. The complex migrates at ~550 kDa in clear-native PAGE (Coomassie-stained). SDS-PAGE in the second dimension (silver-stained) dissociates all  $cF_1F_0$  subunits except the  $c_{14}$ -ring that migrates above subunit  $\alpha$ . The nanodisc protein MSP2N2 migrates at 45 kDa. Molecular weights in kDa are indicated. **B**, The ADP-inhibited  $cF_1F_0$  complex shows only residual hydrolytic activity in the mU/mg range and is insensitive to reduction by 5 mM TCEP (1, 2). ATP hydrolysis is activated by addition of 0.1% (v/v) LDAO (3, 4). **C**, Clear-native PAGE of  $cF_1F_0$  treated with TCEP and LDAO for activity measurements in (B). LDAO partially dissociates  $cF_0$  from  $cF_1$ . Activation of *E. coli* ATPase by LDAO is attributed to a change in the interaction of  $\epsilon$  subunit with subunit  $\beta$  (69). Red boxes indicate samples 1-3 analyzed by second-

dimension SDS-PAGE in (D). **D**, cF<sub>1</sub>F<sub>0</sub> in sample 1 contains all F<sub>1</sub> and F<sub>0</sub> subunits (*a*, *b*, *b'* and *c*<sub>14</sub> ring). Samples 2 and 3 contain cF<sub>1</sub> subunits  $\alpha$ ,  $\beta$ ,  $\gamma$ ,  $\delta$  and  $\epsilon$ , but not F<sub>0</sub>.

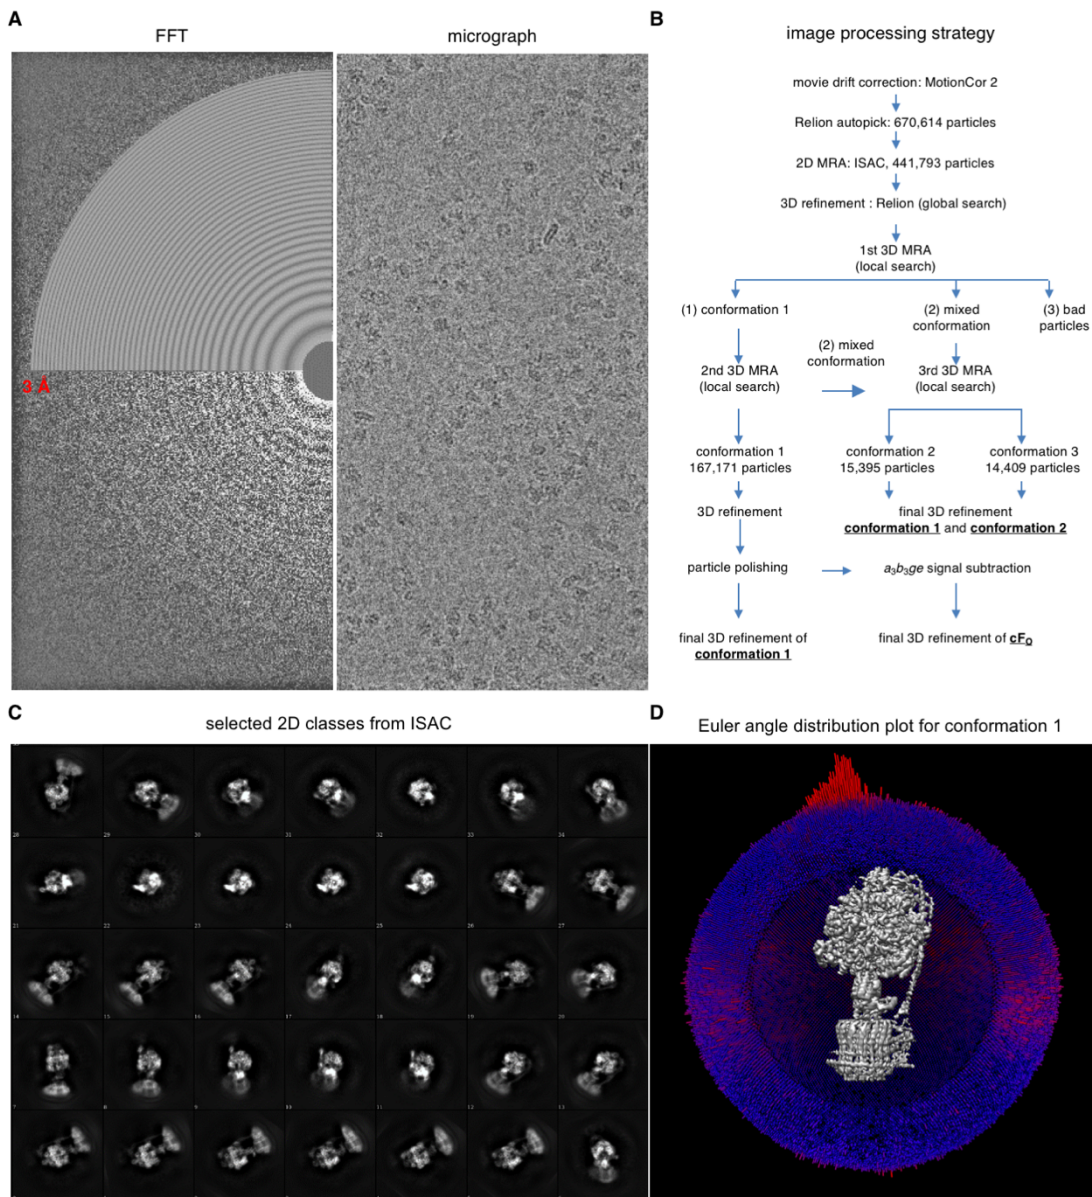

**Fig. S2**

**Image quality and processing.** **A**, Dose-fractionated movies were collected automatically in a Titan Krios with a Falcon III direct electron detector. Drift between movie frames was corrected by MotionCor2. cF<sub>1</sub>F<sub>0</sub> particles are readily visible and evenly distributed. The FFT of most images indicated signal to ~3 Å. **B** Image processing strategy. **C** Selected 2D classes sorted by ISAC. Classes show a wide distribution of equally populated orientations. **D** Plot of Euler angle distribution for particles in conformation 1.

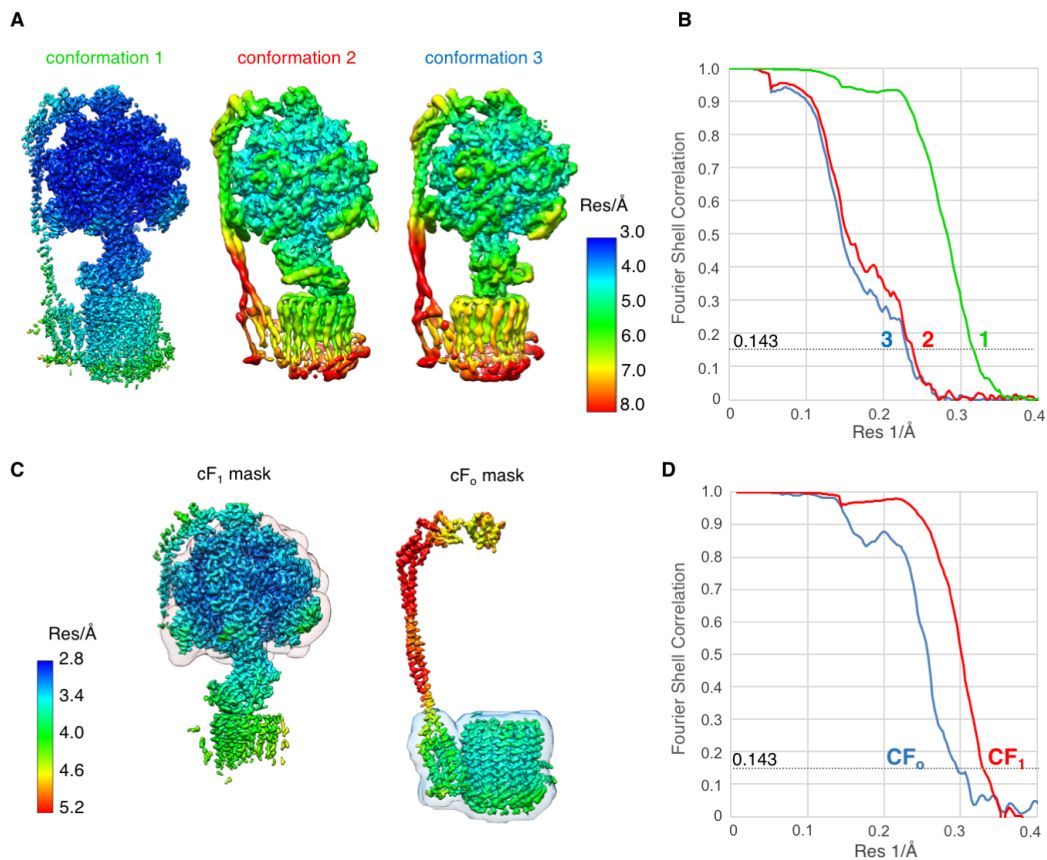

**Fig. S3**

**Global and local resolution estimates.** (A) 3D maps of rotary states in the three main particle classes were reconstructed with Relion 2.1. In all three maps cF<sub>1</sub> is better defined than cF<sub>0</sub>. Local resolution anisotropy (red to green) was estimated with Relion 2.1. (B) Fourier shell correlation (FSC). Resolution was determined for the complete reconstruction of conformations 1, 2 and 3. Conformation 1 has the highest number of particles and attains an overall resolution of 3.15 Å, as estimated by FSC 0.143 (70). Particles in Class 2 and 3 were refined to 4.2 and 4.3 Å resolution, respectively. (C) FSC of masked cF<sub>1</sub> (red) and cF<sub>0</sub> (blue). For cF<sub>0</sub> reconstruction, the  $\alpha_3\beta_3\gamma\epsilon$  signal was subtracted from the particle images to improve cF<sub>0</sub> alignment. Local resolution anisotropy (red to green) was estimated with Relion 2.1. (D) FSC 0.143 resolution determination of masked cF<sub>1</sub> and cF<sub>0</sub> as shown in (C). The average resolution of the masked cF<sub>1</sub> and cF<sub>0</sub> reconstructions converged at 3.05 Å and 3.38 Å, respectively.

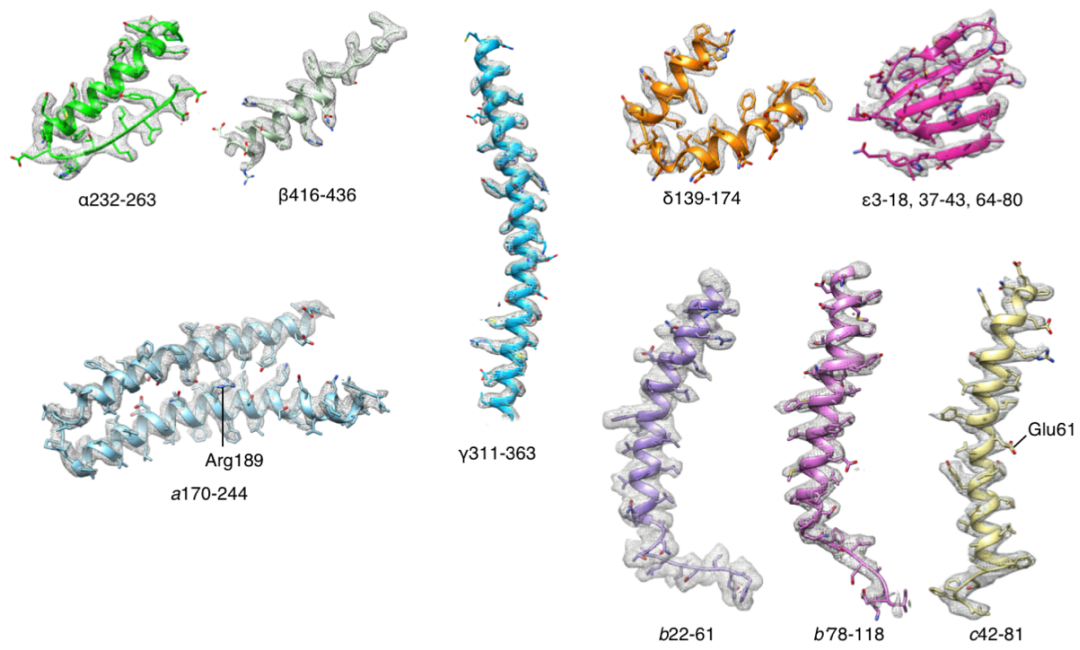

**Fig. S4**

**Examples of atomic models built in the cryo-EM map.** Examples of density and model are shown for each subunit. The range of amino acids shown is indicated for each subunit.

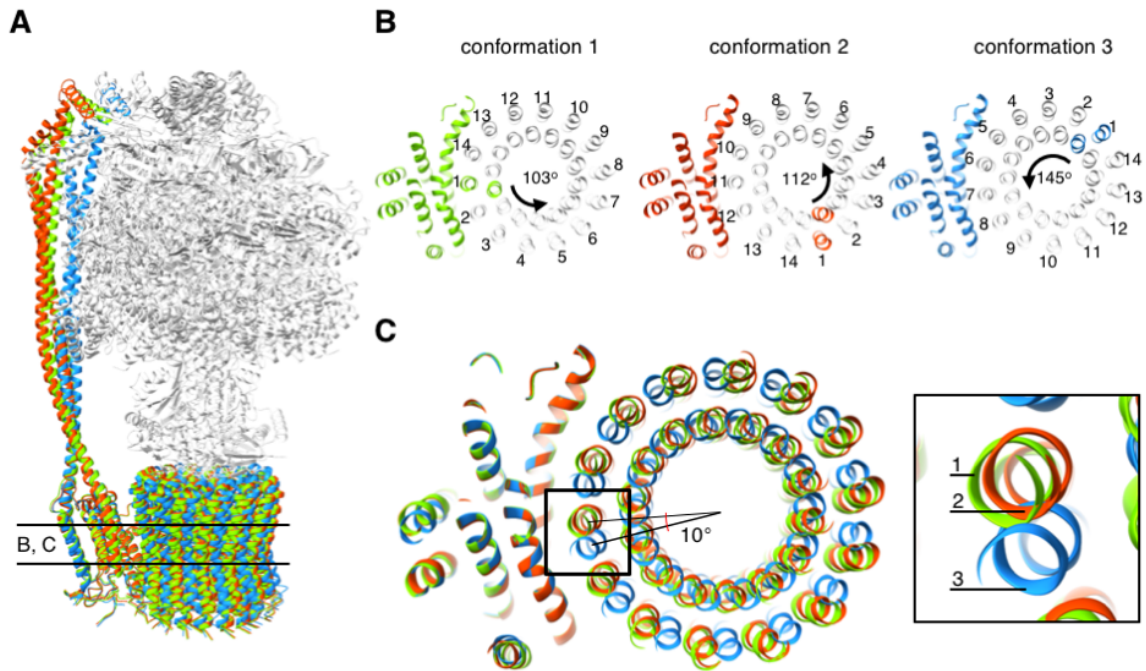

**Fig. S5**

**Orientation of the c-ring.** (A) Superimposed models for conformations 1, 2 and 3 aligned on subunit *a*. Subunits *abb'c*<sub>14</sub> are colored by conformation (1, green; 2, red; 3, blue). (B) Rotation angles between conformations are indicated. (C) Cross-section of superimposed cF<sub>0</sub> conformations as indicated in (A). *c*-ring subunit positions in conformations 1 and 2 are similar; conformation 3 is offset by ~10°, corresponding to almost one half of a *c*-subunit.

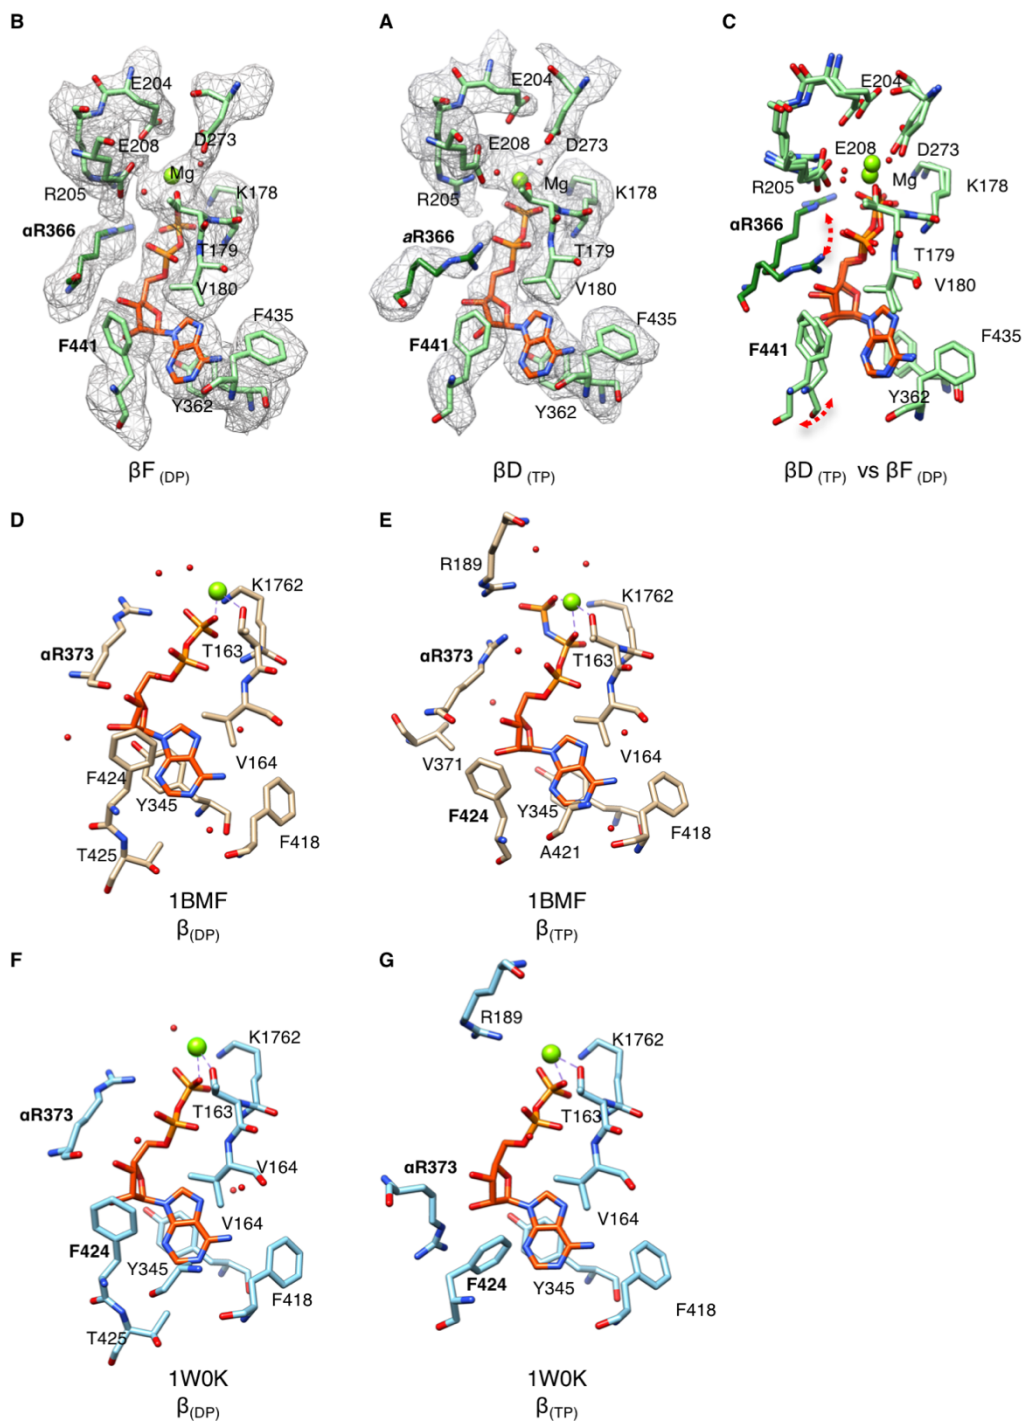

**Fig. S6**

**Nucleotide-binding sites in subunit  $\beta_{TP}$  and  $\beta_{DP}$ .** (A) Mg-ADP in the  $\beta_{DP}$  site of  $\beta$ -subunit F and (B) the  $\beta_{TP}$  site of  $\beta$ -subunit D with adjacent residues fitted to the cryo-EM density filtered to 2.9 Å. Mg ions (green) and coordinating water molecules (red) are resolved. The overlay of the two models (C) shows significant differences in sidechain orientation of  $\alpha$ Arg366 and position of  $\beta$ Phe441 (red dashed arrows). Interestingly, whereas as in other high-resolution cryo-EM structures (71, 72) the carboxylate groups of most acidic sidechains are absent due to electron

irradiation, the sidechains of  $\beta$ Asp273 and  $\beta$ Glu208, which coordinate the water molecules, are well-resolved. Carboxylates with good density in cryo-EM maps are usually involved in ligand binding or strong salt bridges (73). Apparently, carboxylate groups in this chemical environment are more resistant to radiation damage.

The  $F_1$  nucleotide-binding sites are highly conserved throughout evolution; the  $\alpha$  and  $\beta$  subunits of  $cF_1$  respectively share 58 and 67% sequence identity with their mitochondrial counterparts, and the residues forming the nucleotide binding sites are identical (25). **(D)** In  $F_1$  from bovine mitochondria (PDB ID 1BMF) (28), the  $\beta_{DP}$  site contains ADP and is similar to  $cF_1$ . **(E)** the  $\beta_{TP}$  site contains the inhibitor AMP-PNP that was added for crystallization. The residue equivalent to  $\alpha$ Arg366 ( $\alpha$ Arg373) is oriented towards the  $\gamma$ -phosphate. Similar changes in sidechain conformation of this conserved arginine in the  $\beta_{TP}$  site were observed in bovine  $F_1$  when all five sites were occupied by ADP (PDB ID 1W0K) (74) and were taken to result from the absence of a  $\gamma$ -phosphate in the  $\beta_{TP}$  site. ADP molecules and Mg ions, each with two coordinating water molecules, are visible in both the  $\beta_{DP}$  **(F)** and the  $\beta_{TP}$  site **(G)**.



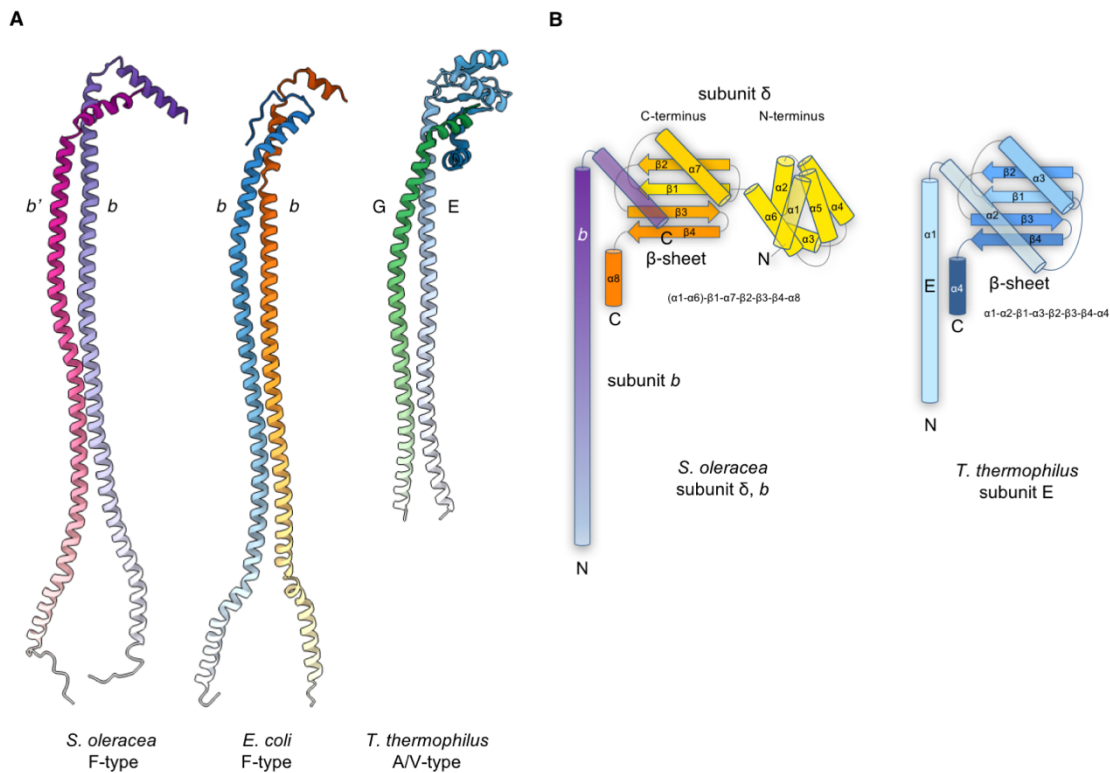

**Fig. S7.**

**Arrangement and conservation of the peripheral stalk in rotary ATPases.** (A) Subunits *b* and *b'* form a right-handed coiled coil. This arrangement is conserved in all rotary ATPases, including the *b*-subunits of F-type ATP synthase from *Escherichia coli* (PDB ID 5TQ4) (18) and the heterodimeric outer stalk of the distantly related A/V-type ATPase from *Thermus thermophilus* (PDB ID 3V6I) (32). (B) The peripheral stalk is attached to  $cF_1$  by the subunit  $\delta$  (OSCP in mitochondria), the C-terminal domain of which consists of a mixed  $\beta$ -sheet fold. This fold is conserved in the C-terminal domain of the peripheral stalk subunit E of the *T. thermophilus* A-type ATPase. The N-terminus of E corresponds to *b* in  $cF_1F_0$  (A). The N-terminal domain of  $\delta$  is absent in A-type ATPases, which have a different architecture than  $F_1F_0$  with two EG peripheral stalks (75), supporting the notion that subunit  $\delta$  ensures the attachment of only one peripheral stalk to  $F_1$ .

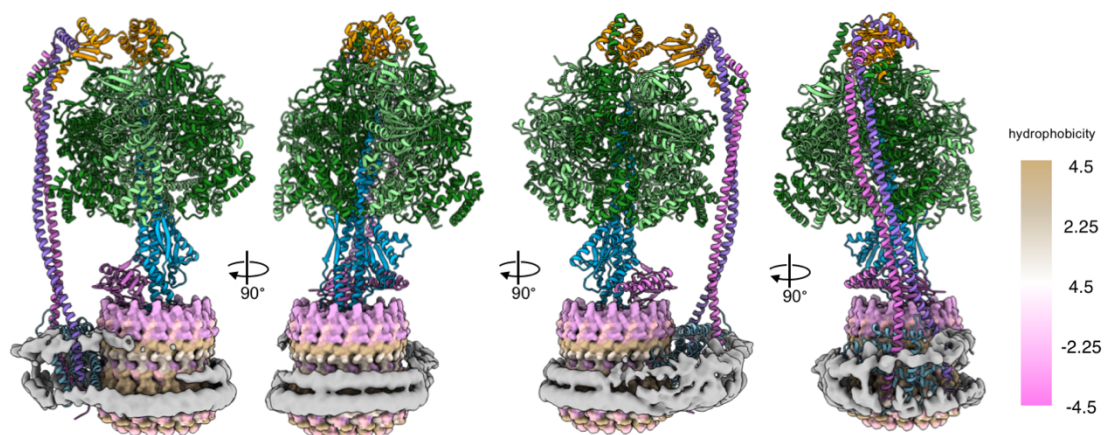

**Fig. S8**

**$cF_1-F_0$  in lipid nanodiscs.** The membrane scaffold protein (MSP; grey density) wraps around and stabilizes the membrane-embedded  $cF_0$  subcomplex. MSP forms a horizontal double belt of  $\alpha$ -helices that are well-defined at the  $c$ -ring/membrane interface but disordered near subunits  $a$ ,  $b$  and  $b'$ . Hydrophobicity of the  $c$ -ring is shown in the Kyte-Doolittle scale with colors ranging from pink for the most hydrophilic to white at 0.0 to tan for the most hydrophobic (76). We see no density for lipid molecules in the map.

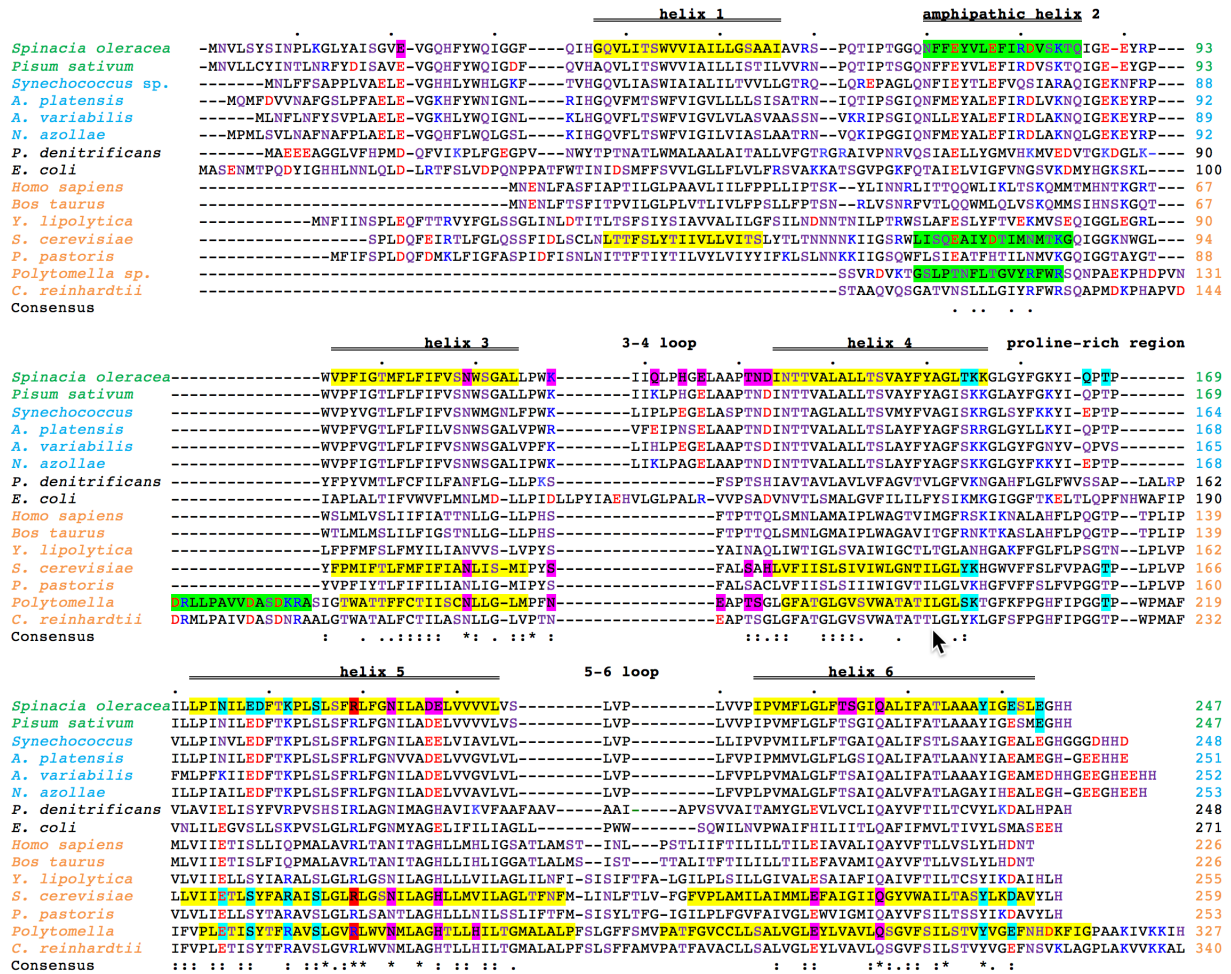

**Fig. S9**  
**Structure-based sequence alignment of ATP synthase subunit *a*.** Sequences are from chloroplasts (green font), cyanobacteria (cyan font), other bacteria (black font) and mitochondria (orange font). Yellow highlights mark membrane-embedded helices H1, H3/4 and H5/6 in spinach chloroplasts (this work) or *Polytomella* (9) and yeast (10) mitochondria. Amphipathic surface helices are highlighted in green. Red highlight: strictly conserved arginine; purple and cyan highlights, polar residues in the proton access and exit channels. Red font, negatively charged residues (aspartate and glutamate); blue font, positively charged residues (lysine and arginine); purple font, polar residues (asparagine, glutamine, serine, threonine, histidine). Consensus: (\*), strictly conserved; (:), highly conserved; (.), similar.

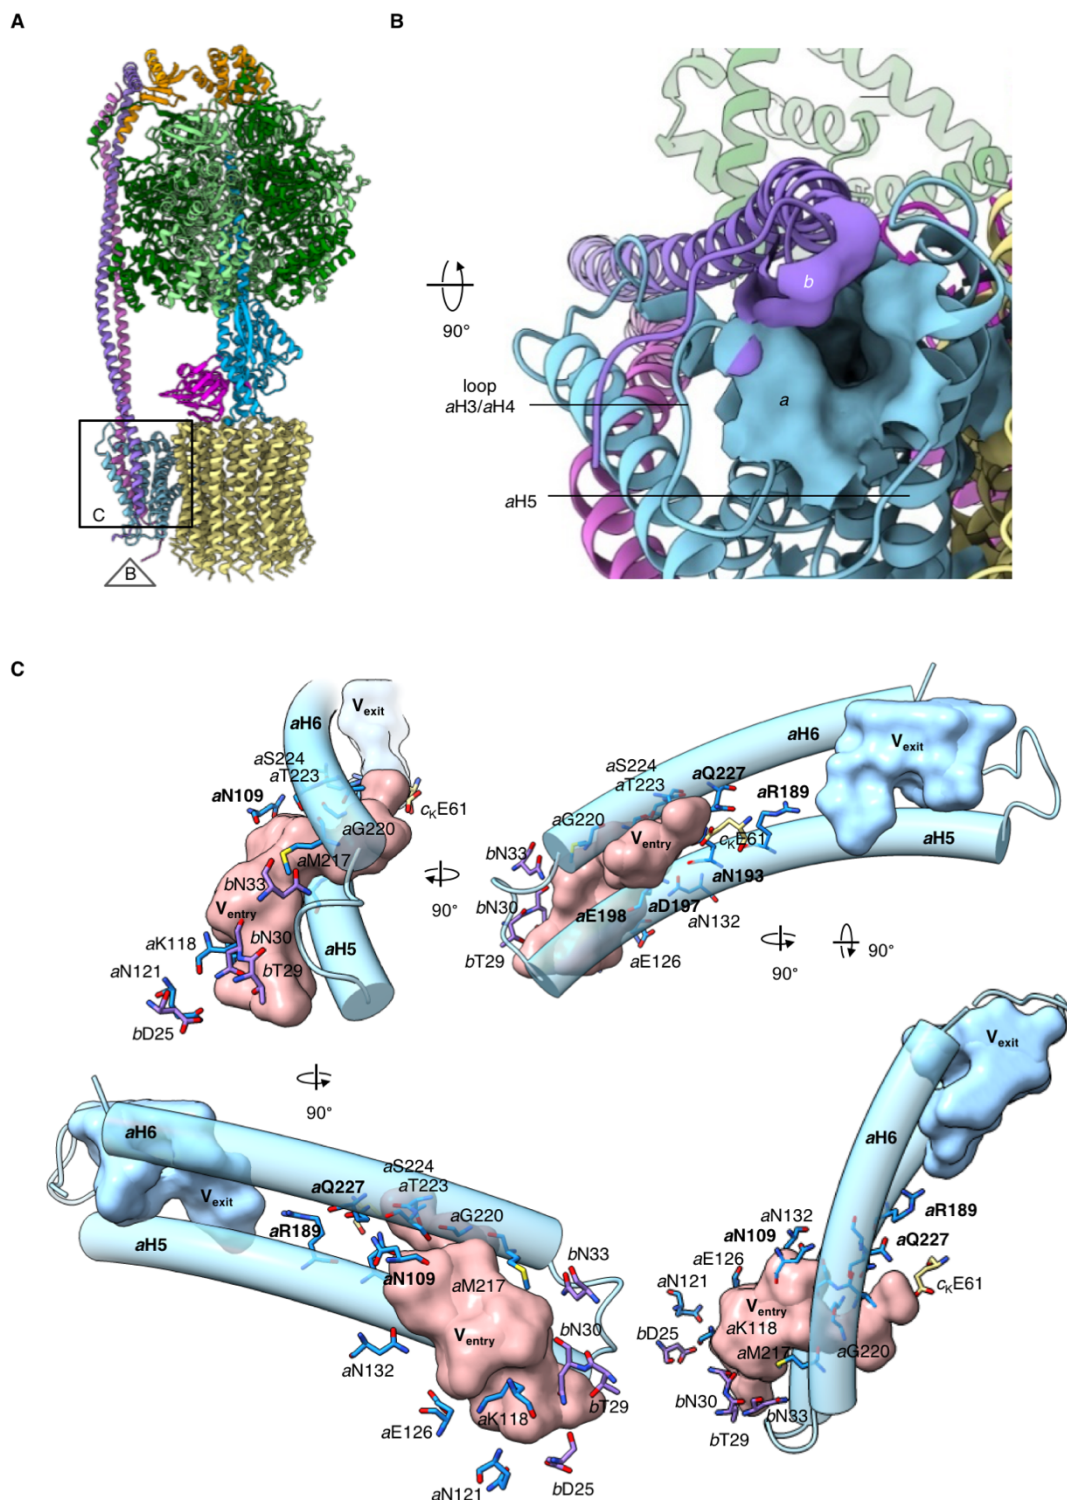

**Fig. S10**

**The luminal proton entry channel.** (A) Overview of *cF<sub>1</sub>F<sub>o</sub>* with channel position indicated. (B) View into the proton entry channel from the lumen as indicated in (A). Water-accessible cavities at the subunit *a/c*<sub>14</sub>-ring interface were mapped with HOLLOW (66). Residues of subunits *a* and

*b* within 3 Å of the mapped channel are shown in surface representation. The entry channel is formed by *a*H5 and *a*H6, the long *a*H3-*a*H4-loop and some subunit *b* residues. (C) View from the membrane plane (slightly slanted, from the side of the *c*-ring) (top panel) and view perpendicular to the membrane from the stroma (lower panel). Charged and polar residues defining the aqueous channel (light red) are shown in stick representation. Strictly conserved residues are labelled bold. The water-filled channel passes between the long *a*H5-*a*H6 hairpin at residues Asp197 and Glu198 and ends at the conserved *c*-ring glutamate *c*Glu61. Amino acid residues are colored according to subunit identity (subunit *a*, blue; subunit *b*, magenta). The arrow indicates the direction of *c*-ring rotation in ATP synthesis mode, with the *c*E61 residues (red) passing the aqueous channel.

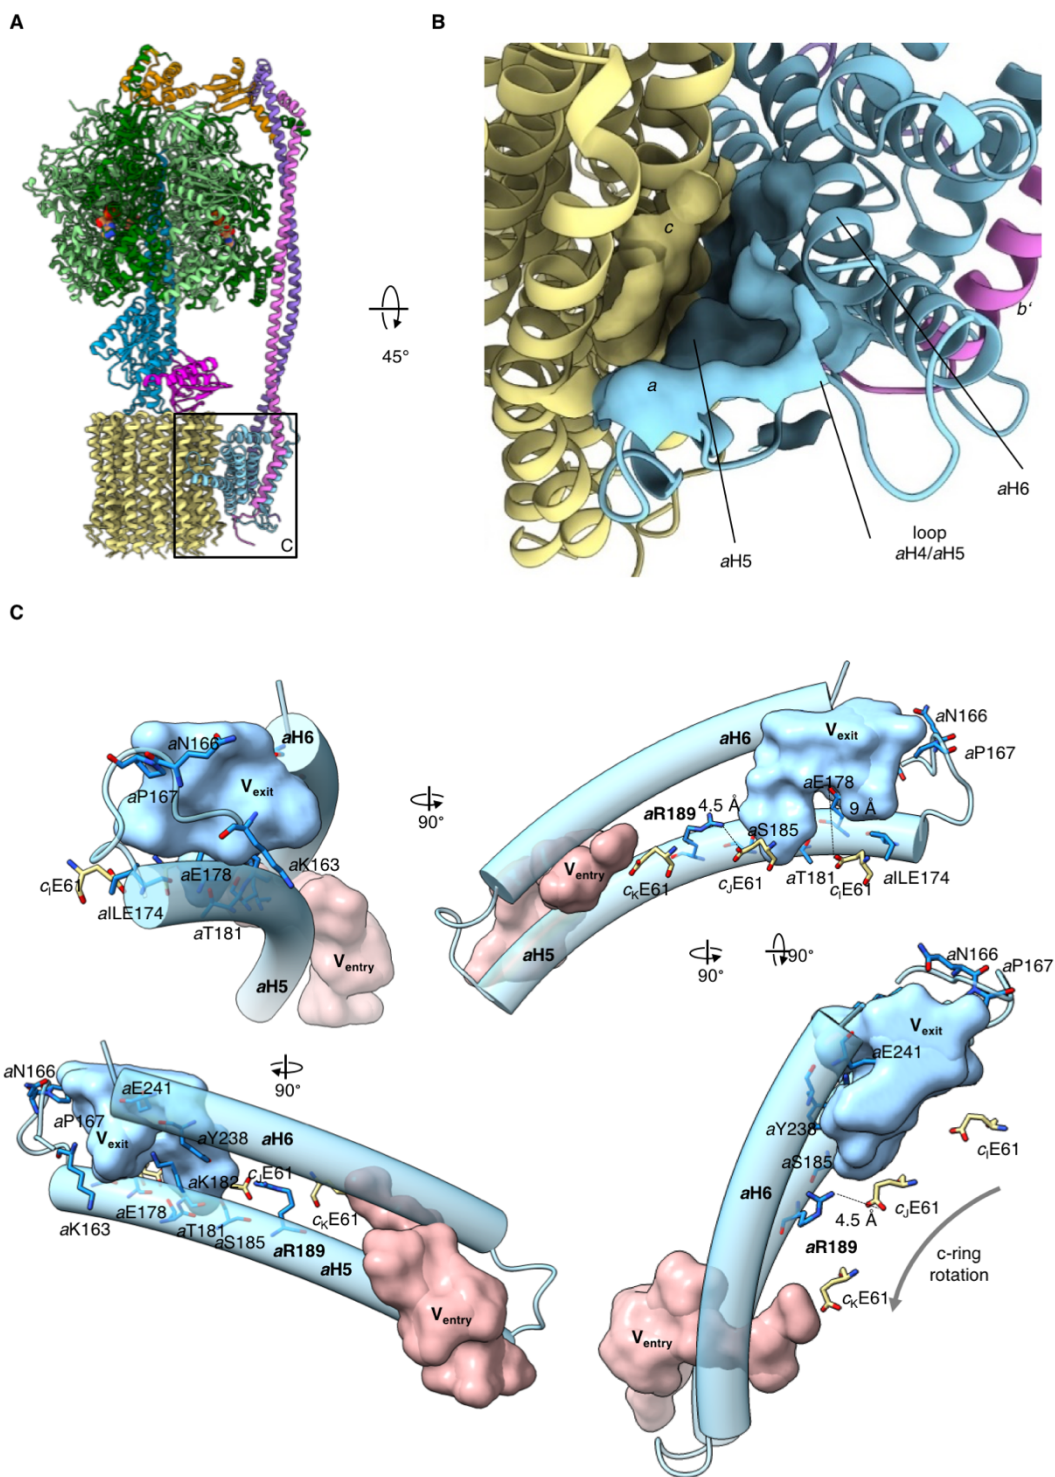

**Fig. S11**

**The stromal proton exit channel.** (A) Overview of *cF<sub>1</sub>F<sub>0</sub>* indicating position of stromal proton exit channel (red box). (B) View into the proton exit channel from the stroma. Water-accessible cavities at the subunit *a/c*<sub>14</sub>-ring interface were mapped with HOLLOW (66). Residues within 3 Å of the mapped channel are shown in surface representation. The exit channel is formed by the

proline-rich loop between *aH4*-*aH5*, *aH5*, *aH6* and the *c*-ring. (C) View of the exit channel from the *c*-ring. Charged and polar residues that form the mapped water-filled cavity (light blue) are shown in stick representation. The cavity runs along the subunit *a/c*-ring interface and ends at the strictly conserved *aArg189*. Protonated *c*-ring glutamates rotating out of the hydrophobic lipid phase enter the aqueous phase and deprotonate. Amino acid residues are colored according to subunit identity (subunit *a*, blue; subunit *c*, pale yellow).

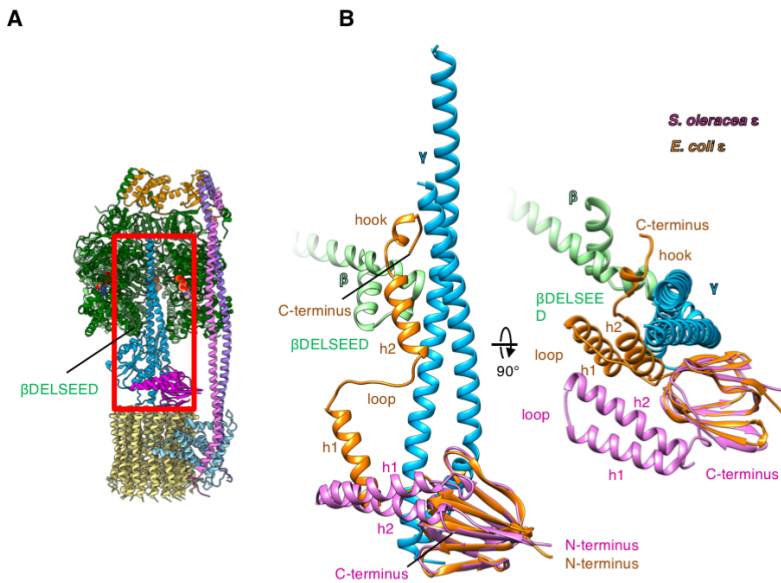

**Fig. S12**

**cF<sub>1</sub>F<sub>0</sub> is not inhibited by subunit  $\epsilon$ .** (A) Overview showing subunit  $\epsilon$  (pink) next to subunit  $\gamma$  (blue). Subunits  $\alpha E$  and  $\beta F$  are omitted for clarity. The red box indicates the  $\gamma\epsilon$  rotor. (B) Detailed side view (left) and top view (right) of the  $\gamma\epsilon$  rotor within the F<sub>1</sub> head. The C-terminal domain of subunit  $\epsilon$  in spinach cF<sub>1</sub>F<sub>0</sub> (pink) has two short  $\alpha$ -helices forming a hairpin next to the N-terminal antiparallel  $\beta$ -barrel. In bacteria, two C-terminal helices h1 and h2 of subunit  $\epsilon$  (orange, PDB ID: 3OAA (42) extend along the  $\gamma$ -subunit rotor (77, 78), and inhibit ATP hydrolysis through interaction of h2 and the hook domain with the DELSEED motif of subunit  $\beta$  (light green). In cF<sub>1</sub>F<sub>0</sub>, h1 and h2 cannot interact with subunit  $\beta$  and thus do not inhibit ATP hydrolysis.





**Table S1.**

Cryo-EM data collection, refinement and validation statistics

|                                                     | Conformation 1<br>(EMDB-4270)<br>(PDB ID 6FKF) | Conformation 2<br>(EMDB-4271)<br>(PDB ID 6FKH) | Conformation 3<br>(EMDB-4272)<br>(PDB ID 6FKI) |
|-----------------------------------------------------|------------------------------------------------|------------------------------------------------|------------------------------------------------|
| <b>Data collection and processing</b>               |                                                |                                                |                                                |
| Electron microscope                                 | Titan Krios                                    | Titan Krios                                    | Titan Krios                                    |
| Electron detector                                   | Falcon III                                     | Falcon III                                     | Falcon III                                     |
| Magnification                                       | 75,000                                         | 75,000                                         | 75,000                                         |
| Voltage (kV)                                        | 300                                            | 300                                            | 300                                            |
| Electron exposure (e <sup>-</sup> /Å <sup>2</sup> ) | 25                                             | 25                                             | 25                                             |
| Defocus range (µm)                                  | 1.5-2.5                                        | 1.5-2.5                                        | 1.5-2.5                                        |
| Pixel size (Å)                                      | 1.053                                          | 1.053                                          | 1.053                                          |
| Symmetry imposed                                    | C1                                             | C1                                             | C1                                             |
| Initial particle images (no.)                       | 670,614                                        | 670,614                                        | 670,614                                        |
| Final particle images (no.)                         | 167,171                                        | 15,395                                         | 14,409                                         |
| Map resolution (Å)                                  | 3.1                                            | 4.2                                            | 4.3                                            |
| FSC threshold                                       | 0.143                                          | 0.143                                          | 0.143                                          |
| Map resolution range (Å)                            | 2.9-3.8                                        | 4-8                                            | 4-8                                            |
| Map sharpening <i>B</i> factor (Å <sup>2</sup> )    | -150                                           | -163                                           | -167                                           |
| <b>Model building and refinement</b>                |                                                |                                                |                                                |
| Initial models used (PDB ID)                        | 1KMH, 5HKK, 2RQ7, 2A7U, 3C3V                   | 6FKF                                           | 6FKF                                           |
| Model composition                                   |                                                |                                                |                                                |
| Protein chains                                      | 26                                             |                                                |                                                |
| Protein residues                                    | 5201                                           |                                                |                                                |
| Ligands                                             | 3 Mg-ATP,<br>2 Mg-ADP                          |                                                |                                                |
| R.m.s. deviations                                   |                                                |                                                |                                                |
| Bond lengths (Å)                                    | 0.017                                          |                                                |                                                |
| Bond angles (°)                                     | 1.25                                           |                                                |                                                |
| Ramachandran plot                                   |                                                |                                                |                                                |
| Favored (%)                                         | 96.23                                          |                                                |                                                |
| Disallowed (%)                                      | 0.08                                           |                                                |                                                |
| Validation                                          |                                                |                                                |                                                |
| MolProbity score                                    | 1.89                                           |                                                |                                                |
| Clashscore                                          | 13.42                                          |                                                |                                                |
| Poor rotamers (%)                                   | 0.29                                           |                                                |                                                |
| EMRinger score                                      | 3.43                                           |                                                |                                                |
